# Supplementary material for: Using the Galilean Relativity Principle to Understand the Physical Basis for Magnetosphere-Ionosphere Coupling Processes
Source: Copernicus journal article supplement (doi:10.5194/angeo-2019-108), 2019-08-26
Supplement: Supplementary file [file angeo-2019-108-RC2-supplement.pdf]

Review report on “Using the Galilean Relativity Principle to understand the physical basis for magnetosphere-ionosphere coupling processes” by Anthony J. Mannucci et al.

### General comments

The authors discuss the problematic interpretation of the electric field in ionospheric electrodynamics, using the “Galilean Relativity Principle” which is a limiting case of the theory of special relativity. While this assertion seems reasonable, the paper includes unacceptable reasoning as I comment below. Also the content of the paper is generally “reinterpretation” of the previous work, without much of scientifically new. However, I think the problem presentation by the authors is useful to the space science community, because such discussion cannot be found in textbooks nor in journal papers. I would like to recommend publication after revision in response to the following comments.

### Specific comments

(1) Although I agree with the authors on the conventional problematic interpretation of ionospheric electrodynamics in terms of the electric field, I disagree with the authors’ conclusion that the magnetospheric currents that close in the ionosphere play no role in the magnetosphere-ionosphere coupling (on lines 25-27, lines 414-415, lines 438-440, lines 454-490, lines 522-524). This conclusion is drawn on lines 452-490 by comparing the kinetic momentum of current-carrying electrons with the kinetic momentum of neutrals. I cannot understand the authors’ logic employed. The density of electromagnetic momentum carried by the field-aligned currents is given by

$$\mathbf{p}_m = \frac{\mp \frac{1}{\mu_0} B_0 \Delta \mathbf{B}_\perp}{V_A} = \mp \sqrt{\frac{m_i n_i}{\mu_0}} \Delta \mathbf{B}_\perp \quad \left( \begin{array}{l} \text{the upper minus sign applies to the northern ionosphere} \\ \text{the lower plus sign applies to the southern ionosphere} \end{array} \right)$$

and can be comparable to the momentum density of neutrals ( $\Delta \mathbf{p}_n$ ). In fact, in the case of a magnetospheric dynamo, what causes a nonzero relative velocity between ions and neutrals ( $\mathbf{u}_i - \mathbf{u}_n$ , which is initially zero) is the ion acceleration by the  $\mathbf{j} \times \mathbf{B}$  force in the ionosphere. The ions are accelerated until the  $\mathbf{j} \times \mathbf{B}$  force balances the collisional force  $-m_i n_i \nu_{in} (\mathbf{u}_i - \mathbf{u}_n)$ .

(2) In all descriptions in this paper, an initial finite  $\mathbf{u}_i - \mathbf{u}_n$  with  $\mathbf{j} = \mathbf{0}$  seems assumed. This is the case of ionospheric dynamo (neutral dynamo). At the same time, however, the case of magnetospheric dynamo (magnetospheric flow increases suddenly while  $\mathbf{u}_i - \mathbf{u}_n = \mathbf{0}$  and  $\mathbf{j} = \mathbf{0}$  in the ionosphere) is often discussed in parallel or in mixture. This is very confusing, and sometimes the reasoning is incorrect. Examples are on lines 291-292, lines 419-421, lines 429-436, and lines 451-452. The authors should separate the discussion.

(3) (Minor comment) On line 431, “Through flux conservation”: What kind of flux do the authors mean?

(4) (Minor comment) I cannot understand the statement on lines 506-507. In what context did the authors add this statement?

### Technical comments

None. The manuscript is well written.
